# Supplementary material for: Proteomics Reveals Novel Drosophila Seminal Fluid Proteins Transferred at Mating
Source: PLoS Biol. 2008 Jul 29;6(7):e178. doi: 10.1371/journal.pbio.0060178 (PMC2486302; doi:10.1371/journal.pbio.0060178)
Supplement: Table S2 — (58 KB XLS) [file pbio.0060178.st002.xls]

## Sheet: Table S2
Protein	#Exp	sim?	yak?	Novel	FBgn	CG#	Ch	Strand	NSAF	comp	dN/dS	dN	dS	8/8a p	Functional Class
Acp24A4	4	yes	no	no	FBgn0051779	CG31779-PB	2L	-	55	sec	1.0906	0.1407	0.129	0.00986009	protease inhibitor
Acp26Aa	6	yes	yes	no	FBgn0002855	CG8982	2L	-	20	sim	1.2415	0.1765	0.1422	3.01165e-08	post-mating behavior
Acp26Ab	6	yes	yes	no	FBgn0002856	CG9024	2L	-	13	sim	0.2723	0.0387	0.142		unknown function
Acp29AB	5	yes	no	no	FBgn0015583	CG17797	2L	-	68	sim	0.3352	0.0805	0.2401	0.438578	carbohydrate binding
Acp36DE	6	yes	yes	no	FBgn0011559	CG7157	2L	-	19	sim	0.5821	0.0593	0.1019	0.124482	post-mating behavior
Acp53C14a	6	yes	yes	no	FBgn0034152	CG8626	2R	-	11	sim	0.0404	0.004	0.0989		unknown function
Acp53C14b	6	yes	yes	no	FBgn0034153	CG15616	2R	-	2	sim	0.2776	0.035	0.1259		unknown function
Acp53C14c	1	yes	no	no	FBgn0053530	CG33530	2R	-	93	sim	0.6902	0.0815	0.118	0.0531245	unknown function
Acp53Ea	6	yes	yes	no	FBgn0015584	CG8622	2R	-	30	sim	0.2904	0.0397	0.1367		unknown function
Acp62F	6	yes	yes	no	FBgn0020509	CG1262	3L	+	5	sim	0.3716	0.0702	0.1888	3.73798e-05	protease inhibitor
Acp63F	6	yes	no	no	FBgn0015585	CG10852	3L	-	8	sim	0.7997	0.1864	0.2331	0.0206038	unknown function
Acp70A	6	yes	yes	no	FBgn0003034	CG17673	3L	+	9	sim	0.3317	0.0342	0.1031		post-mating behavior
Acp76A	6	yes	yes	no	FBgn0015586	CG3801	3L	-	25	sim	0.1371	0.0248	0.1807		protease inhibitor
Acp95EF	3	yes	no	no	FBgn0002863	CG17924	3R	+	29	sim	0.1625	0.038	0.234		unknown function
alphaTub84B/84D	2	yes	yes	no	FBgn0003884/0003885	CG1319/2512	3R	+	52	n/a	-	-	-		sperm protein
Anp	2	no	yes	yes	FBgn0000094	CG1361	3R	+	63	sim	1.6747	0.1097	0.0655	0.15121	defense/immunity
betaTub85D	3	yes	yes	no	FBgn0003889	CG9359	3R	-	43	sim	0.001	0.0002	0.2426		sperm protein
Ccp84Ad	5	no	no	yes	FBgn0004780	CG2341	3R	+	59	sim	0.0372	0.0066	0.1783		chitin binding
Cdlc2	2	yes	yes	no	FBgn0026141	CG5450	2L	+	36	sim	0.001	0.0003	0.3312		sperm protein
CG10041	3	no	yes	yes	FBgn0038014	CG10041	3R	-	107	sim	0.1614	0.0282	0.1746		protease
CG10284	5	yes	yes	no	FBgn0037441	CG10284	3R	+	69	sim	0.4718	0.0478	0.1012		protease inhibitor
CG10407	1	no	no	yes	FBgn0038395	CG10407	3R	-	127	sim	0.166	0.0224	0.1348		unknown function
CG10433	1	no	yes	no	FBgn0034638	CG10433	2R	-	70	sim	0.1428	0.0069	0.048		defense/immunity
CG10586	1	no	no	no	FBgn0037036	CG10586	3L	-	130	sec	0.3598	0.028	0.0779		protease
CG10587	1	no	yes	no	FBgn0037039	CG10587	3L	-	131	sim	0.1414	0.0187	0.132		protease
CG10651	1	yes	yes	no	FBgn0032853	CG10651	2L	-	116	sec	0.1646	0.0264	0.1603		defense/immunity
CG10730	1	no	no	yes	FBgn0032843	CG10730	2L	-	137	sim	0.1345	0.0234	0.1741		unknown function
CG10862	1	no	no	yes	FBgn0035455	CG10862	3L	-	133	sim	0.9159	0.1307	0.1427	0.777297	ubiquitin ligase
CG11037	5	yes	yes	no	FBgn0037038	CG11037	3L	-	80	sim	0.0662	0.008	0.1207		protease
CG11598-PB	2	yes	no	no	FBgn0038067	CG11598-PB	3R	+	115	n/a	-	-	-		lipid metabolism
CG11608	2	yes	no	no	FBgn0038069	CG11608	3R	+	105	sim	0.3219	0.0443	0.1375		lipid metabolism
CG11630	1	no	no	yes	FBgn0032964	CG11630	2L	-	136	sim	0.1361	0.0161	0.1182		unknown function
CG11864	3	yes	no	no	FBgn0028944	CG11864	2L	-	87	sim	0.2839	0.0381	0.1343		protease
CG12879	3	no	no	yes	FBgn0039540	CG12879	3R	+	85	sim	0.1876	0.0461	0.2457		unknown function
CG12943	1	no	no	yes	FBgn0033572	CG12943	2R	+	113	sim	0.1528	0.0163	0.1066		transport
CG13340	1	yes	yes	yes	FBgn0033868	CG13340	2R	-	110	sim	0.022	0.0031	0.1431		protease
CG13965	4	yes	yes	no	FBgn0032834	CG13965	2L	-	74	sim	0.4029	0.0396	0.0984		unknown function
CG14034-PB	2	yes	yes	no	FBgn0031691	CG14034-PB	2L	-	83	sim	0.1432	0.022	0.1533		lipid metabolism
CG14061	6	yes	yes	no	FBgn0039598	CG14061	3R	-	60	sim	0.1559	0.0209	0.1342		unknown function
CG15031	1	no	no	yes	FBgn0030623	CG15031	X	-	132	sec	0.9078	0.1199	0.1321	0.41656	unknown function
CG15116	1	no	no	no	FBgn0034415	CG15116	2R	-	122	sim	0.0782	0.0119	0.1518		defense/immunity
CG15117	6	no	no	yes	FBgn0034417	CG15117	2R	-	54	sim	0.0366	0.0057	0.1567		carbohydrate metabolism
CG15635	5	yes	no	yes	FBgn0031617	CG15635	2L	+	120	n/a	-	-	-		DNA interactions
CG15641	1	no	no	no	FBgn0030643	CG15641	X	+	92	sec	0.1346	0.0355	0.2641		unknown function
CG1701-PB	1	yes	yes	yes	FBgn0033167	CG1701-PB	2R	-	95	sim	0.2617	0.0509	0.1944	0.41656	unknown function
CG17050	1	no	no	yes	FBgn0033831	CG17050	2R	-	124	sec	0.3425	0.0592	0.1727	n/a	unknown function
CG17097-PC	6	yes	no	no	FBgn0032275	CG17097-PC	2L	+	50	n/a	-	-	-		lipid metabolism
CG17242	3	no	no	yes	FBgn0042188	CG17242	2L	-	79	sim	0.3662	0.051	0.1393	0.431047	protease
CG17472	6	yes	yes	no	FBgn0032868	CG17472	2L	+	33	sim	0.8777	0.1636	0.1864	0.00637899	unknown function
CG17575	6	yes	yes	no	FBgn0033776	CG17575	2R	-	84	sim	0.0102	0.0014	0.139		defense/immunity
CG17843	6	yes	yes	no	FBgn0038919	CG17843	3R	+	62	sim	0.2203	0.0231	0.1049		oxidative stress response
CG17919	2	yes	no	yes	FBgn0037433	CG17919	3R	+	97	sim	0.0691	0.0159	0.2304		signal transduction
CG18067	2	yes	yes	yes	FBgn0034512	CG18067	2R	+	82	sim	0.2042	0.0249	0.122		unknown function
CG18135	3	yes	yes	yes	FBgn0036837	CG18135	3L	-	88	sim	0.026	0.0032	0.1223		unknown function
CG18284	4	yes	yes	no	FBgn0043825	CG18284	2L	+	45	sim	0.2368	0.0501	0.2116	0.15939	lipid metabolism
CG18628	3	yes	no	yes	FBgn0036091	CG18628	3L	+	34	sim	0.0172	0.006	0.3502		unknown function
CG2852	6	yes	yes	no	FBgn0034753	CG2852	2R	-	35	sim	0.012	0.0019	0.1578		protein modification
CG30395	3	no	no	no	FBgn0050395	CG30395	2R	+	106	n/a	-	-	-		unknown function
CG30486	1	no	yes	no	FBgn0050486	CG30486	2R	-	128	sim	0.0873	0.0116	0.1323		unknown function
CG30488	6	yes	yes	no	FBgn0050488	CG30488	2R	-	58	sim	0.2598	0.0474	0.1824		defense/immunity
CG31418	1	yes	yes	no	FBgn0051418	CG31418	3R	+	123	sim	0.3126	0.0736	0.2354	0.00637899	unknown function
CG31419	3	yes	yes	yes	FBgn0051419	CG31419	3R	+	51	sim	0.2462	0.0389	0.1581		unknown function
CG31515	1	yes	no	yes	FBgn0051515	CG31515	3R	-	99	sim	0.94	0.1354	0.144	0.00110668	unknown function
CG3153	2	no	no	yes	FBgn0038198	CG3153	3R	+	65	sim	0.0442	0.0076	0.1714		unknown function
CG31659	5	no	yes	no	FBgn0051659	CG31659	2L	-	61	sim	0.1865	0.0343	0.1838		unknown function
CG31680	5	no	no	no	FBgn0051680	CG31680	2L	+	44	sec	0.127	0.0322	0.2533		unknown function
CG31704	3	no	no	yes	FBgn0051704	CG31704	2L	+	23	sim	0.6626	0.0823	0.1242	0.0482861	protease inhibitor
CG31758	2	no	no	yes	FBgn0051758	CG31758	2L	-	47	sim	0.3445	0.0687	0.1996	0.841481	protease inhibitor
CG31872	6	yes	yes	no	FBgn0051872	CG31872	2L	+	18	sim	0.5431	0.0773	0.1422	1.18834e-07	lipid metabolism
CG31883	6	yes	yes	yes	FBgn0032122	CG31883	2L	+	21	n/a	-	-	-		unknown function
CG32203-PB	6	yes	yes	no	FBgn0052203	CG32203-PB	3L	-	56	n/a	-	-	-		protease inhibitor
CG32667	5	yes	yes	no	FBgn0052667	CG32667	X	-	32	sim	0.21	0.0151	0.0717		unknown function
CG32833	5	no	yes	no	FBgn0052833	CG32833	2R	-	71	sec	0.2632	0.0467	0.1773		protease
CG33259	1	no	no	no	FBgn0036495	CG33259	3L	+	49	sim	0.22	0.0344	0.1565		unknown function
CG34002	4	yes	yes	yes	FBgn0054002	CG34002	3L	+	86	n/a	-	-	-		unknown function
CG34033	4	yes	yes	yes	FBgn0054033	CG34033	2R	+	67	n/a	-	-	-		unknown function
CG34034	2	yes	no	yes	FBgn0054034	CG34034	3R	-	100	n/a	-	-	-		unknown function
CG34051	5	yes	yes	no	FBgn0054051	CG34051	2L	-	41	n/a	-	-	-		unknown function
CG34129	2	yes	no	no	FBgn0083965	CG34129	3R	-	117	n/a	-	-	-		protease
CG34130	3	no	yes	yes	FBgn0083966	CG34130	3R	-	90	n/a	-	-	-		protease
CG34435	1	no	no	yes	FBgn0085464	CG34435	X	-	121	n/a	-	-	-		unknown function
CG4815	1	no	no	no	FBgn0039568	CG4815	3R	-	129	sim	0.519	0.0559	0.1078	0.0120738	protease
CG4847	6	yes	no	no	FBgn0034229	CG4847	2R	+	17	sim	0.1523	0.0208	0.1367		protease
CG5162	4	yes	yes	yes	FBgn0030828	CG5162	X	+	64	sec	0.0866	0.011	0.1276		lipid metabolism
CG5267	2	no	yes	yes	FBgn0034154	CG5267	2R	+	89	n/a	-	-	-		unknown function
CG5402	1	no	no	yes	FBgn0039521	CG5402	3R	-	77	sim	0.4356	0.0766	0.1758	0.099098	unknown function
CG6071	5	no	no	yes	FBgn0036186	CG6071	2L	-	96	sec	0.1668	0.0278	0.1667		protease
CG6289	4	yes	yes	no	FBgn0036970	CG6289	3L	+	66	sim	0.8152	0.0793	0.0973	1.12583e-06	protease inhibitor
CG6426	2	no	no	yes	FBgn0034162	CG6426	2R	+	102	sec	0.0401	0.0052	0.1294		defense/immunity
CG6461	6	yes	yes	no	FBgn0030932	CG6461	X	-	76	sec	0.0934	0.0152	0.163		protease
CG6555	6	yes	yes	no	FBgn0032367	CG6555	2L	-	4	n/a	-	-	-		unknown function
CG6663	3	no	no	yes	FBgn0036969	CG6663	3L	+	57	n/a	-	-	-		protease inhibitor
CG6690	5	yes	no	yes	FBgn0038918	CG6690	3R	+	91	sim	0.3549	0.049	0.1382		protein modification
CG8102	1	no	no	no	FBgn0034007	CG8102	2L	+	125	sim	0.0542	0.0081	0.1487		sperm protein
CG9029	6	yes	no	no	FBgn0031746	CG9029	X	+	6	sim	0.8633	0.0735	0.0852	0.729034	defense/immunity
CG9168	2	no	no	yes	FBgn0035216	CG9168	3L	+	135	sec	0.059	0.0107	0.1819		unknown function
CG9975	1	no	no	yes	FBgn0034435	CG9975	X	-	119	sim	0.0579	0.0077	0.1336		unknown function
CG9997	6	yes	yes	no	FBgn0039597	CG9997	3R	-	40	sim	0.3745	0.0354	0.0944		protease
Cpr51A	2	no	no	yes	FBgn0033942	CG10112	2R	-	53	sec	0.0805	0.0136	0.1689		chitin binding
Cpr67Fb	3	no	no	yes	FBgn0036110	CG18348	3L	+	81	sec	0.22	0.0332	0.1508		chitin binding
Cys	3	yes	yes	yes	FBgn0004629	CG8050	3R	-	46	sim	0.3589	0.0613	0.1709	0.596701	protease inhibitor
Dup99B	5	yes	no	no	FBgn0024381	CG33495	3R	-	42	sim	0.4964	0.0813	0.1637	1	post-mating behavior
Egm	3	no	no	yes	FBgn0086712	CG9006	2R	-	118	sim	0.096	0.0137	0.1425		oxidative stress response
Est-6	5	yes	no	no	FBgn0000592	CG6917	3L	+	73	sim	0.1291	0.022	0.1705		lipid metabolism
Hexo2	2	no	no	yes	FBgn0041629	CG1787	X	+	126	sim	0.0166	0.0029	0.1752		carbohydrate metabolism
lectin-29Ca	6	yes	yes	no	FBgn0040098	CG17799	2L	-	37	sim	0.3658	0.082	0.2242	0.470842	carbohydrate binding
lectin-30A	6	yes	yes	no	FBgn0040097	CG17011	2L	-	38	sim	0.5639	0.0624	0.1107	0.0613688	carbohydrate binding
lectin-46Ca	5	yes	yes	no	FBgn0040093	CG1656	2R	+	94	sim	0.1476	0.0138	0.0936		carbohydrate binding
lectin-46Cb	4	yes	yes	no	FBgn0040092	CG1652	2R	+	103	sec	0.1002	0.0154	0.1541		carbohydrate binding
LysC	6	yes	yes	yes	FBgn0004426	CG9111	3L	+	27	sim	∞	0.0094	0.0001	1	defense/immunity
Met75Ca/75Cb	6	yes	yes	no	FBgn0028416/FBgn0028415	CG32197/CG18064	3L	-	7	sim	2.7802	0.1048	0.0377	4.35928e-06	unknown function
mfas-PB	2	yes	no	no	FBgn0024211	CG3359-PB	3R	-	114	sim	0.0175	0.0025	0.144		signal transduction
msopa	4	yes	no	no	FBgn0004414	CG14560	3L	+	31	n/a	-	-	-		defense/immunity
Mst57Da	6	yes	yes	no	FBgn0011668	CG9074	3R	-	1	sim	0.1209	0.0239	0.1975		defense/immunity
Mst57Db	6	yes	yes	no	FBgn0011669	CG5016	3R	-	10	sim	0.7191	0.0942	0.131	0.0335008	unknown function
Mst57Dc	6	yes	no	no	FBgn0011670	CG4986	3R	-	12	sim	0.9137	0.1354	0.1482	0.000365656	unknown function
NLaz	3	yes	no	yes	FBgn0053126	CG33126	2L	-	101	sim	0.0225	0.002	0.0904		lipid metabolism
NUCB1	2	yes	yes	yes	FBgn0052190	CG32190	3L	-	104	n/a	-	-	-		calcium binding
Obp22a	2	no	yes	yes	FBgn0043539	CG31941	2L	-	39	sec	0.466	0.0701	0.1505	4.87172e-09	odorant binding
Obp51a	6	yes	yes	yes	FBgn0043530	CG30473	2R	-	28	sim	0.0954	0.0228	0.2389		odorant binding
Obp56e	6	yes	yes	yes	FBgn0034471	CG8462	2R	+	24	sim	0.2726	0.0251	0.0922		odorant binding
Obp56f	6	yes	yes	yes	FBgn0043533	CG30450	2R	+	22	sim	0.3321	0.0583	0.1755	0.497624	odorant binding
Obp56g	6	yes	yes	yes	FBgn0034474	CG13873	2R	-	16	sim	0.2453	0.0246	0.1004		odorant binding
Obp56i	1	yes	yes	yes	FBgn0043532	CG30448	2R	+	112	sim	0.4162	0.0567	0.1363	0.689157	odorant binding
OdsH	1	no	no	yes	FBgn0026058	CG6352	X	+	134	n/a	-	-	-		DNA interactions
Or82a	3	no	no	yes	FBgn0041621	CG31519	3R	+	108	sim	0.1127	0.0168	0.1489		odorant binding
Peb	6	yes	yes	no	FBgn0004181	CG2668	2R	-	48	sim	0.6139	0.0451	0.0734	n/a	post-mating behavior
PebII	6	yes	yes	no	FBgn0011694	CG2665	2R	-	3	sim	0.2273	0.0139	0.0611		unknown function
Peritrophin-A	1	no	no	yes	FBgn0022770	CG17058	X	+	109	sim	0.0215	0.0032	0.1496		chitin binding
Phm	3	no	yes	yes	FBgn0019948	CG3832	X	-	111	sec	0.0302	0.0046	0.1527		protein modification
Porin2	1	yes	yes	no	FBgn0069354	CG17137	2L	-	75	sim	0.06	0.0132	0.2202		sperm protein
regucalcin	6	yes	yes	yes	FBgn0030362	CG1803	X	+	26	sim	0.0318	0.0064	0.2025		defense/immunity
scpr-A	1	yes	no	yes	FBgn0037889	CG5207	3R	+	72	sim	0.0265	0.0102	0.3843		unknown function
Spn1	5	yes	yes	yes	FBgn0028988	CG9456	2R	+	78	sec	0.1151	0.0153	0.1327		protease inhibitor
Spn2	6	yes	yes	no	FBgn0028987	CG8137	2L	-	15	sim	0.8133	0.0857	0.1054	9.63556e-14	protease inhibitor
Spn3	6	no	yes	no	FBgn0028986	CG9334	2L	-	14	n/a	-	-	-		protease inhibitor
Spn7	3	no	no	yes	FBgn0083141	CG6717	2L	+	98	sim	0.3786	0.0558	0.1473	0.211665	protease inhibitor
trx	1	no	no	yes	FBgn0003862	CG8651	3R	-	138	n/a	-	-	-		DNA interactions
	Key to abbreviations
Protein	Protein identified
#Exp	Number of experiments (out of 6) in which protein was detected
sim?	Found in D. simulans experiments?
yak?	Found in D. yakuba experiments?
Novel	Newly identified seminal fluid component?
FBgn	FBgn identification number
CG#	CG number
Ch	Chromosomal arm
Strand	Strand of DNA that contains the coding sequence
NSAF	Abundance ranking, based on NSAF value (1 = most abundant)
comp	Species used for pairwise, whole-gene dN/dS comparison
dN/dS	Estimate of dN/dS in pairwise, whole-gene comparison
dN	Estimate of dN
dS	Estimate of dN
8/8a p	If tested, PAML M8 vs. M8a p-value (after Bonferroni correction, p < 0.00139 is significant)
Functional Class	Functional class based on FlyBase, GO, sperm proteome (Dorus et al.) and other annotations
sim	D. simulans
sec	D. sechellia
n/a	reliable alignment not available for pairwise comparison
